# Supplementary material for: Impaired Cardiac Sympathetic Activity Is Associated With Myocardial Remodeling and Established Biomarkers of Heart Failure
Source: PubMed Central journal article supplement — J Am Heart Assoc. 2024 Jul 3;13(14):e035264. doi: 10.1161/JAHA.124.035264 (PMC11292752; doi:10.1161/jaha.124.035264), 2024-07-03
Supplement: JAH3-13-e035264-s001.pdf [file JAH3-13-e035264-s001.pdf]

# **SUPPLEMENTAL MATERIAL**

**Table S1. Echocardiographic Characteristics of Study Participants.**

| Variables                          | Summary Statistics              |                               |                               | P-values (Holm adj.) |                      |                    |
|------------------------------------|---------------------------------|-------------------------------|-------------------------------|----------------------|----------------------|--------------------|
|                                    | Control,<br>N = 20 <sup>*</sup> | HFpEF,<br>N = 33 <sup>†</sup> | HFrEF,<br>N = 28 <sup>†</sup> | Control<br>vs. HFpEF | Control<br>vs. HFrEF | HFpEF vs.<br>HFrEF |
| LV EDV index, mL/m <sup>2</sup>    | 45 (6)                          | 50 (21)                       | 119 (58)                      | 0.68                 | <0.01                | <0.01              |
| LV ESV index, mL/m <sup>2</sup>    | 16 (3)                          | 21 (12)                       | 83 (49)                       | 0.05                 | <0.01                | <0.01              |
| LVEF (Simpson's), %                | 65 (7)                          | 59 (8)                        | 33 (9)                        | <0.01                | <0.01                | <0.01              |
| LV Mass index, mL/m <sup>2</sup>   | 71 (12)                         | 104 (38)                      | 158 (70)                      | 0.02                 | <0.01                | <0.01              |
| LA volume index, mL/m <sup>2</sup> | 23 (5)                          | 39 (11)                       | 43 (16)                       | <0.01                | <0.01                | 0.28               |
| Relative wall thickness            | 0.32 (0.03)                     | 0.34 (0.04)                   | 0.27 (0.07)                   | 0.15                 | <0.01                | <0.01              |
| E/A ratio                          | 1.65 (0.62)                     | 1.35 (0.81)                   | 1.45 (1.06)                   | 0.71                 | 0.90                 | 0.90               |
| E/e' ratio                         | 6.8 (2.0)                       | 11.0 (5.2)                    | 16.4 (5.3)                    | <0.01                | <0.01                | <0.01              |
| GLS, % (*-1)                       | 19.5 (2.9)                      | 16.2 (4.0)                    | 8.1 (3.6)                     | <0.01                | <0.01                | <0.01              |

<sup>\*</sup> n (%); Median (IQR); Mean (SD)  
Abbreviations: HFpEF, heart failure with preserved ejection fraction; HFrEF, heart failure with reduced ejection fraction; LA, left atrium; LV, left ventricle; EF, ejection fraction; EDV, end-diastolic volume; ESV, end-systolic volume; GLS, global longitudinal strain; E, early diastolic transmitral flow velocity; A, late diastolic transmitral flow velocity; e', early diastolic mitral annular tissue velocity;

**Table S2. Cardiopulmonary Exercise Testing Characteristics of Study Participants.**

| Variables                                                                                                                                                                                                                                                                                                                                       | Summary Statistics  |                   |                   | P-values (Holm adj.) |                      |                    |
|-------------------------------------------------------------------------------------------------------------------------------------------------------------------------------------------------------------------------------------------------------------------------------------------------------------------------------------------------|---------------------|-------------------|-------------------|----------------------|----------------------|--------------------|
|                                                                                                                                                                                                                                                                                                                                                 | Control,<br>N = 20* | HFpEF,<br>N = 33* | HFrEF,<br>N = 28* | Control vs.<br>HFpEF | Control vs.<br>HFrEF | HFpEF vs.<br>HFrEF |
| <b>At rest</b>                                                                                                                                                                                                                                                                                                                                  |                     |                   |                   |                      |                      |                    |
| Heart rate, bpm                                                                                                                                                                                                                                                                                                                                 | 82 (13)             | 72 (13)           | 78 (14)           | 0.05                 | 0.28                 | 0.28               |
| Systolic blood pressure at rest, mmHg                                                                                                                                                                                                                                                                                                           | 119 (20)            | 140 (18)          | 129 (23)          | <0.01                | 0.12                 | 0.08               |
| Diastolic blood pressure at rest, mmHg                                                                                                                                                                                                                                                                                                          | 79 (9)              | 89 (11)           | 83 (13)           | 0.02                 | 0.34                 | 0.07               |
| <b>During exercise</b>                                                                                                                                                                                                                                                                                                                          |                     |                   |                   |                      |                      |                    |
| Peak heart rate, bpm                                                                                                                                                                                                                                                                                                                            | 163 (18)            | 127 (27)          | 135 (27)          | <0.01                | 0.01                 | 0.24               |
| Peak systolic blood pressure, mmHg                                                                                                                                                                                                                                                                                                              | 172 (26)            | 187 (29)          | 166 (24)          | 0.15                 | 0.41                 | 0.01               |
| Peak diastolic blood pressure, mmHg                                                                                                                                                                                                                                                                                                             | 86 (11)             | 91 (14)           | 81 (11)           | 0.32                 | 0.32                 | 0.02               |
| Exercise duration, s                                                                                                                                                                                                                                                                                                                            | 774 (160)           | 534 (126)         | 719 (212)         | 0.04                 | 0.41                 | 0.11               |
| Peak RER                                                                                                                                                                                                                                                                                                                                        | 1.15 (0.2)          | 1.01(0.4)         | 1.00 (0.1)        | 0.03                 | 0.02                 | 0.29               |
| % predicted peak VO <sub>2</sub>                                                                                                                                                                                                                                                                                                                | 103 (25)            | 86 (26)           | 78 (19)           | 0.04                 | <0.01                | 0.19               |
| Crude peak VO <sub>2</sub> , mL/min                                                                                                                                                                                                                                                                                                             | 1,972 (687)         | 1,540 (601)       | 1,427 (425)       | 0.03                 | <0.01                | 0.45               |
| Peak VO <sub>2</sub> , mL/min/kg                                                                                                                                                                                                                                                                                                                | 30 (10)             | 19 (6)            | 18 (4)            | <0.01                | <0.01                | 0.58               |
| OUES                                                                                                                                                                                                                                                                                                                                            | 1,818 (583)         | 1,545 (569)       | 1,397 (503)       | 0.20                 | 0.04                 | 0.31               |
| Peak oxygen pulse, mL/min/beat                                                                                                                                                                                                                                                                                                                  | 12.3 (3.9)          | 13.1 (4.4)        | 11.9 (3.5)        | 1.00                 | 1.00                 | 0.72               |
| % predicted oxygen pulse                                                                                                                                                                                                                                                                                                                        | 114 (25)            | 110 (33)          | 101(31)           | 0.71                 | 0.53                 | 0.53               |
| * n (%); Median (IQR); Mean (SD)<br>Abbreviations: HFpEF, heart failure with preserved ejection fraction; HFrEF, heart failure with reduced ejection fraction; RER, respiratory exchange ratio; VO <sub>2</sub> , oxygen uptake; VE, pulmonary ventilation; VCO <sub>2</sub> , carbon dioxide production; OUES, oxygen uptake efficiency slope. |                     |                   |                   |                      |                      |                    |

**Figure S1:  $^{123}\text{I}$ -MIBG H/M and CMR-ECV associations with LV remodeling across study groups**

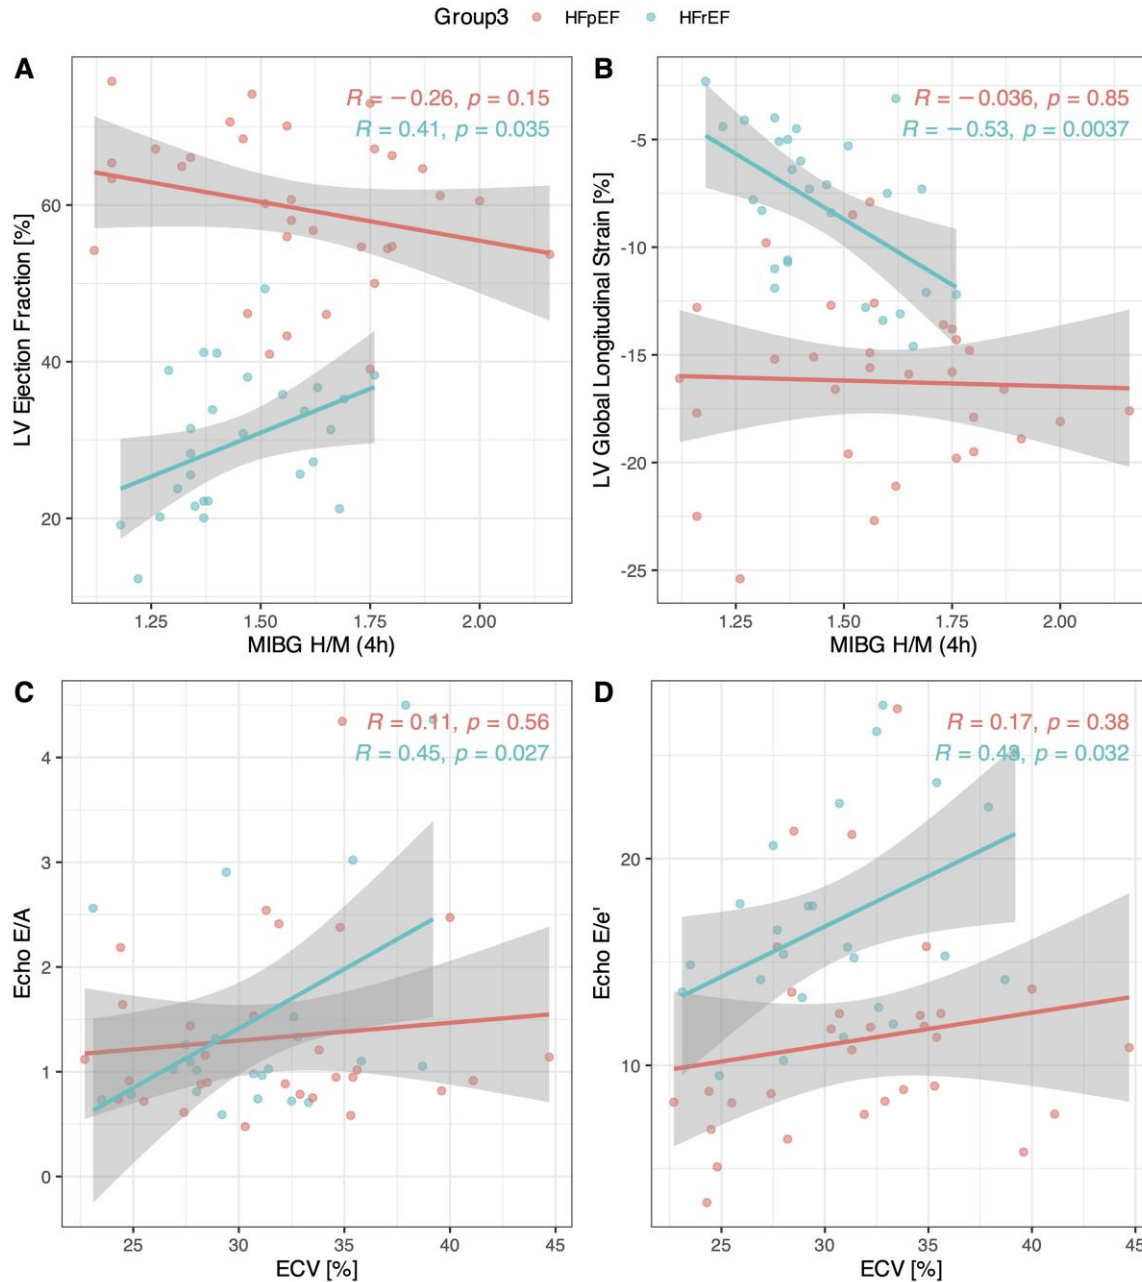

A: The left ventricular ejection fraction (LVEF) correlated significantly ( $r=0.41$ ;  $p=0.035$ ) with the MIBG H/M ratio in HF patients with reduced ejection fraction (HFrEF), but not with preserved ejection fraction (HFpEF). B: Similarly, to LVEF, global longitudinal strain

correlated significantly with the MIBG H/M ratio in HF patients with reduced ejection fraction (HFrEF), but not with preserved ejection fraction (HFpEF) C: ECV correlated significantly with the diastolic function index E/A. D: ECV correlated significantly ( $r=0.43$ ;  $p=0.032$ ) with the diastolic function index E/e'. E/e' was significantly higher in HFrEF compared HFpEF, indicating a worse impairment of diastolic function in HFrEF. E/e' correlated only nominally with MIBG H/M in HFrEF.

**Figure S2: Associations of imaging variables with <sup>123</sup>I-MIBG late H/M ratio across all participants:**

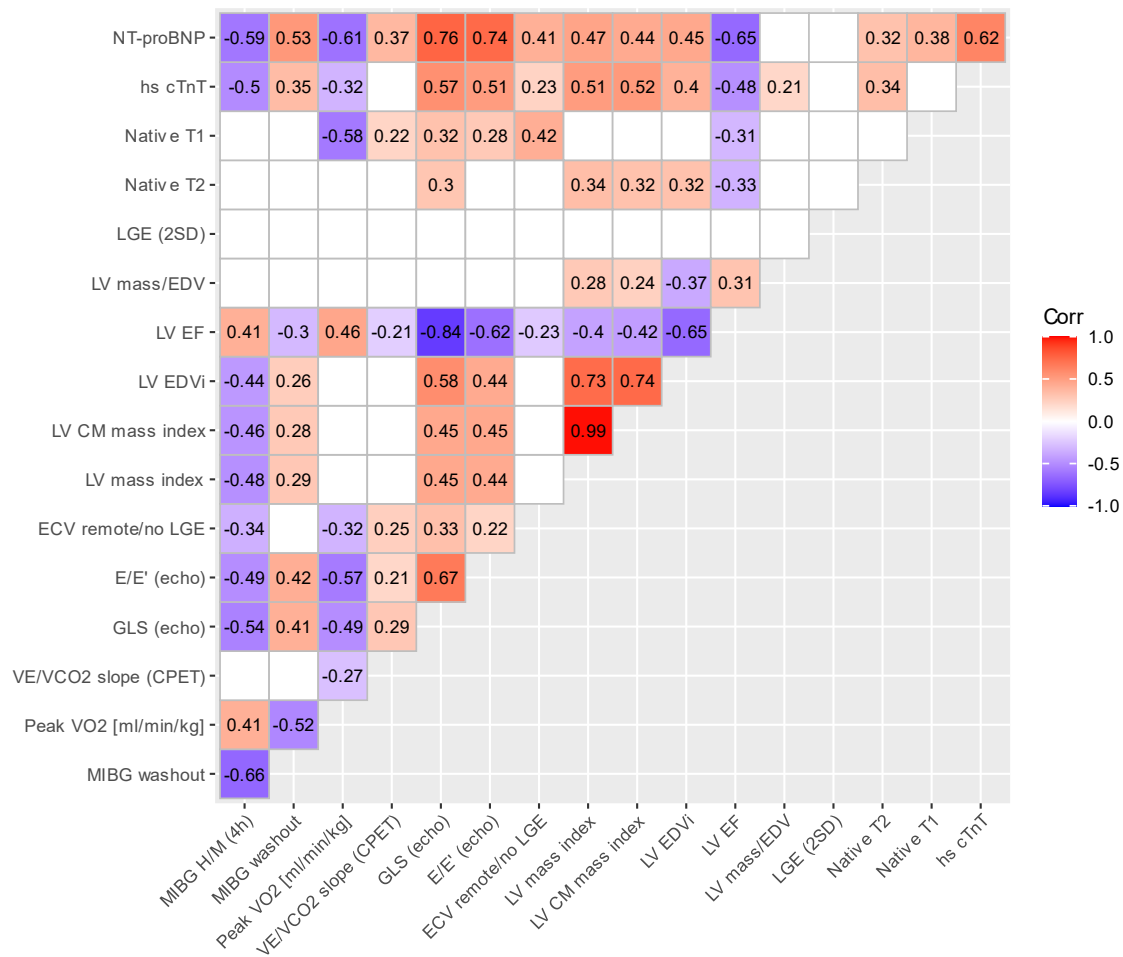

Several imaging variables demonstrated significant associations with <sup>123</sup>I-MIBG late heart-to-mediastinum (H/M) ratio across all participants. Significant correlations (Pearson) with late <sup>123</sup>I-MIBG H/M were found for: LVEF (R=0.41, p<0.05), LV end-diastolic volume index (R=-

0.44,  $p < 0.001$ ), LV mass index ( $R = -0.48$ ,  $p < 0.001$ ), LV cardiomyocyte (CM) mass index ( $R = -0.46$ ,  $p < 0.001$ ), extracellular volume (ECV) remote ( $R = -0.34$ ,  $p < 0.003$ ),  $E/e'$  ( $R = -0.49$ ,  $p < 0.001$ ), and global longitudinal strain (GLS) ( $R = -0.35$ ,  $p < 0.001$ ). Only significant correlations ( $p < 0.05$ ) are depicted in the correlation matrix plot, with the numbers in the cells indicating the strength of Pearson's correlation. For the serum biomarkers cardiac high-sensitivity troponin T (hs-cTnT) and NT-proBNP their log-transformed values were used.

**Figure S3: Medication analysis:**

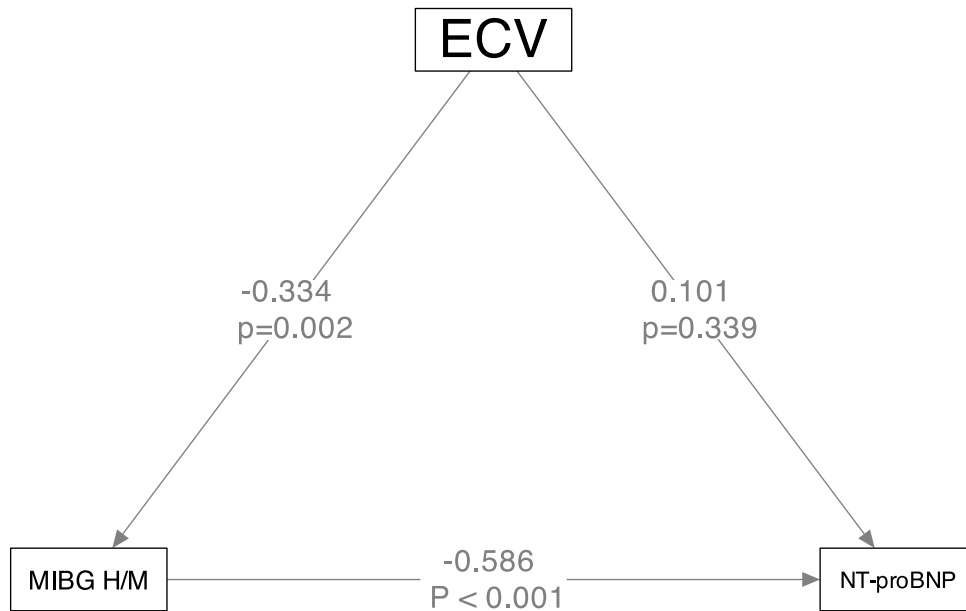

The effects of the myocardial extracellular volume (ECV; average excluding LGE segments) and  $^{123}\text{I}$ -MIBG H/M with NT-proBNP were analyzed with a mediation model that hypothesized that ECV may have a direct effect on NT-proBNP, and also an indirect effect mediated by  $^{123}\text{I}$ -MIBG H/M. The myocardial extracellular volume (ECV) had no significant direct effect on NT-proBNP, but the indirect effect mediated by the myocardial  $^{123}\text{I}$ -MIBG H/M was significant ( $P < 0.001$ ). The indirect effect mediated by MIBG H/M suggests that the mechanism for the ECV effect on NT-proBNP may involve a reduction of sympathetic innervation density by expansion of the extracellular matrix, a characteristic of adverse tissue remodeling in HF patients.
